# Supplementary material
Source: publisher figshare collection journal article supplement (https://asha.figshare.com/articles/dataset/_/9789041)
Supplement: Supplementary file 1 [file 1]

**Supplemental Material S1.** Effects of age at implantation and language achievement with age as a discrete variable (age groups): Information provided by authors for cochlear implant (CI) users and calculated effect sizes (NC = not calculable from information provided).

| Authors                                                 | Groups  | <i>N</i> | Mean age at CI (SD) [range]   | Mean age at test (SD) [range] | Mean duration of CI use (SD) [range] | Language domain: Assessment/task <sup>2</sup>                                         | Statistical analyses <sup>1</sup>         | Primary findings                                                                                                                                                                                                                                                             | Effect size (Glass' <i>d</i> )                                                                                                          |
|---------------------------------------------------------|---------|----------|-------------------------------|-------------------------------|--------------------------------------|---------------------------------------------------------------------------------------|-------------------------------------------|------------------------------------------------------------------------------------------------------------------------------------------------------------------------------------------------------------------------------------------------------------------------------|-----------------------------------------------------------------------------------------------------------------------------------------|
| <i>N</i> age groups                                     |         |          |                               |                               |                                      |                                                                                       |                                           |                                                                                                                                                                                                                                                                              |                                                                                                                                         |
| Artières, Vieu, Mondain, Uziel, & Venail (2009)         | Group 1 | 32       | 1.7 y<br>[1.1–1.9]            | 3.9<br>[2.7–6.4]              | 2.7<br>[1.1–4.5]                     | Receptive vocabulary: PPVT<br><br>Expressive language (5-levels scale of development) | <i>t</i> tests<br><br>Logistic regression | Differences between groups were more consistent for groups of later-implanted children (mean age at CI 3.6 vs 4.5);<br><br>Regression analysis: better receptive vocabulary scores were significantly associated with age at CI.<br>No association with expressive language. | Group 1 vs group 2<br>PPVT at age 5: .69<br>Expressive language at age 4: .80                                                           |
|                                                         | Group 2 | 15       | 2.6 y<br>[2.5–2.9]            | 8<br>[5.6–9.1]                | 5.3<br>[3.1–6.6]                     |                                                                                       |                                           |                                                                                                                                                                                                                                                                              | Group 2 vs group 3<br>Expressive language at age 5: 1.001                                                                               |
|                                                         | Group 3 | 14       | 3.6 y<br>[3.3–3.7]            | 6.9<br>[5.8–10.2]             | 3.1<br>[2.5–6.3]                     |                                                                                       |                                           |                                                                                                                                                                                                                                                                              | Group 3 vs group 4<br>PPVT at: age 5: .95<br>age 6: 1.2<br>age 8: .83<br>Expressive language at: age 5: 1.0<br>age 6: .98<br>age 8: .81 |
|                                                         | Group 4 | 13       | 4.5 y<br>[4.3–4.6]            | 9.9<br>[7.2–11]               | 4.5<br>[2.7–6.2]                     |                                                                                       |                                           |                                                                                                                                                                                                                                                                              | —                                                                                                                                       |
| Colletti, Mandalà, Zoccante, Shannon, & Colletti (2011) | Group 1 | 19       | 6.4 mo (2.8)<br><i>n</i> = 10 | —                             | 10-year follow-up                    | Receptive vocabulary: PPVT                                                            | Wilcoxon-Mann-Whitney                     | Earliest-implanted group outperformed later implanted groups on both tasks.                                                                                                                                                                                                  | NC                                                                                                                                      |
|                                                         | Group 2 | 16       | 19.3 mo (3.8)                 | —                             |                                      | Receptive grammar: TROG                                                               |                                           |                                                                                                                                                                                                                                                                              |                                                                                                                                         |
|                                                         | Group 3 | 33       | 30.1 mo                       | —                             |                                      |                                                                                       |                                           |                                                                                                                                                                                                                                                                              |                                                                                                                                         |

|                                                                      |          |     |                        |                                                                                                                    |                                                                 |                                                                                                                                                                  |                                                |                                                                                                                                                                              |                                                                                                   |
|----------------------------------------------------------------------|----------|-----|------------------------|--------------------------------------------------------------------------------------------------------------------|-----------------------------------------------------------------|------------------------------------------------------------------------------------------------------------------------------------------------------------------|------------------------------------------------|------------------------------------------------------------------------------------------------------------------------------------------------------------------------------|---------------------------------------------------------------------------------------------------|
|                                                                      |          |     | (5.9)<br><i>n</i> = 21 |                                                                                                                    |                                                                 |                                                                                                                                                                  |                                                |                                                                                                                                                                              |                                                                                                   |
| Connor, Craig, Raudenbush, Heavner, & Zwolan (2006)                  | Group A1 | 21  | 21 mo                  | —                                                                                                                  | 4 years [up to 13 years]                                        | Receptive vocabulary: PPVT (raw scores)                                                                                                                          | Hierarchical linear modeling (HLM); Regression | Earliest implanted group had greater rates of vocabulary growth than children in other groups for the first 3 years after implantation.                                      | NC                                                                                                |
|                                                                      | Group A2 | 15  | 36 mo                  | —                                                                                                                  |                                                                 |                                                                                                                                                                  |                                                |                                                                                                                                                                              |                                                                                                   |
|                                                                      | Group 2  | 20  | 50 mo                  | —                                                                                                                  |                                                                 |                                                                                                                                                                  |                                                |                                                                                                                                                                              |                                                                                                   |
|                                                                      | Group 3  | 44  | 90 mo                  | —                                                                                                                  |                                                                 |                                                                                                                                                                  |                                                |                                                                                                                                                                              |                                                                                                   |
| Dettman, Dowell, Choo, Arnott, Abrahams, Davis, ... & Briggs (2016)  | Group 1  | 151 | 0.70 y (0.15)          | PPVT: 5.6 y (0.87) ( <i>n</i> = 207)<br>PLS: 5.4 y (1.0) ( <i>n</i> = 95)<br>CELF: 8.02 y (2.22) ( <i>n</i> = 122) | PPVT: 3.4 y (1.1)<br>PLS: 3.8 y (1.0)<br>CELF: 6.03 y (2.02)    | Receptive vocabulary: PPVT<br><br>Receptive and expressive language: PLS 4 and 5<br><br>Receptive and expressive language: CELF                                  | Regression<br><br>ANOVA                        | Group 1 outperformed other groups for all language measures (Group 1 had longer CI experience at the time of PPVT and PLS testing).                                          | (PPVT at school entry) vs group 2: .89                                                            |
|                                                                      | Group 2  | 61  | 1.24 y (0.14)          |                                                                                                                    |                                                                 |                                                                                                                                                                  |                                                |                                                                                                                                                                              | vs group 3: .91                                                                                   |
|                                                                      | Group 3  | 66  | 1.75 y (0.13)          |                                                                                                                    |                                                                 |                                                                                                                                                                  |                                                |                                                                                                                                                                              | vs group 4: -1.8                                                                                  |
|                                                                      | Group 4  | 82  | 2.60 y (0.43)          |                                                                                                                    |                                                                 |                                                                                                                                                                  |                                                |                                                                                                                                                                              | vs group 5: .03                                                                                   |
|                                                                      | Group 5  | 43  | 4.45 y (0.69)          |                                                                                                                    |                                                                 |                                                                                                                                                                  |                                                |                                                                                                                                                                              | —                                                                                                 |
| Holt & Svirsky (2008)                                                | Group 1  | 6   | 10.2 mo                | From 12 to 96 months                                                                                               | From 6 to 90 months                                             | Receptive language: MBCDI or RDLS<br>Expressive language: MBCDI or RDLS                                                                                          | Regression (on DTA)<br><br>HLM                 | Receptive: differences between groups were significant throughout the entire follow-up period.<br>Expressive: no differences between the two earlier-implanted groups (1-2). | NC                                                                                                |
|                                                                      | Group 2  | 32  | 18.6 mo                |                                                                                                                    |                                                                 |                                                                                                                                                                  |                                                |                                                                                                                                                                              |                                                                                                   |
|                                                                      | Group 3  | 37  | 29.9 mo                |                                                                                                                    |                                                                 |                                                                                                                                                                  |                                                |                                                                                                                                                                              |                                                                                                   |
|                                                                      | Group 4  | 21  | 40.8 mo                |                                                                                                                    |                                                                 |                                                                                                                                                                  |                                                |                                                                                                                                                                              |                                                                                                   |
| Miyamoto, Hay-McCutcheon, Iler Kirk, Houston, & Bergeson-Dana (2008) | Group 1  | 8   | Before 12 mo           | —                                                                                                                  | PLS at 6 mo to 1 y of use ( <i>n</i> =13); RDLS at 2-3 y of use | Receptive language:<br>- PLS (standard scores)<br>- RDLS (language quotients);<br>Expressive language:<br>- PLS (standard scores)<br>- RDLS (language quotients) | ANOVA (RDLS)                                   | Differences in language quotients between earlier-implanted and later-implanted groups were not statistically significant.                                                   | Group 1 vs group 2:<br>-Receptive RDLS LQ: -.17<br>Expressive RDLS LQ: .06<br>Receptive PLS: 1.05 |
|                                                                      |          | 38  | From 12 to 23 mo       | —                                                                                                                  |                                                                 |                                                                                                                                                                  |                                                |                                                                                                                                                                              | Group 2 vs group 3:                                                                               |

|                                                                                        |         |                |                                |                                   |                                              |                                                                                                               |                                                                                      |                                                                                                                                                  |                                                                         |
|----------------------------------------------------------------------------------------|---------|----------------|--------------------------------|-----------------------------------|----------------------------------------------|---------------------------------------------------------------------------------------------------------------|--------------------------------------------------------------------------------------|--------------------------------------------------------------------------------------------------------------------------------------------------|-------------------------------------------------------------------------|
|                                                                                        | Group 2 |                |                                |                                   |                                              |                                                                                                               |                                                                                      |                                                                                                                                                  | Receptive RDLS LQ: .43<br>Expressive RDLS LQ: .42<br>Receptive PLS: .85 |
|                                                                                        | Group 3 | 45             | From 24 to 36 mo               | —                                 |                                              |                                                                                                               |                                                                                      |                                                                                                                                                  | —                                                                       |
| May-Mederake (2012)                                                                    | Group 1 | total $N = 28$ | > 12 mo                        | From 33.3 (7.3) to 72.6 (16.3) mo | From 1.77 to 4.45 y depending on the subtest | Receptive language: SETK (6 subtests depending on chronological age);<br>Receptive grammar: TROG ( $n = 19$ ) | Mann-Whitney                                                                         | Children in group 1 had higher scores ( $p = .076?$ ) than children in group 2 only for the Sentence comprehension subtest ( $n = 15$ ).         | NC                                                                      |
|                                                                                        | Group 2 |                | 12–18 mo                       |                                   |                                              |                                                                                                               |                                                                                      |                                                                                                                                                  |                                                                         |
|                                                                                        | Group 3 |                | 18–24 mo                       |                                   |                                              |                                                                                                               |                                                                                      |                                                                                                                                                  |                                                                         |
| Nicholas & Geers (2017)                                                                | Group 1 | 27             | Total sample = 19.23 mo (8.51) | 4.5 y                             | Total sample = 35.54 mo (8.47)               | Expressive language measures (spontaneous samples:<br>- NDRW<br>- MLU-w<br>- NDBM                             | Effect sizes (Cohen’s $d$ ) on mean differences in $z$ -scores; Pearson correlations | Effect sizes of mean differences in $z$ -scores between groups were large for ages at CI below 18 months.                                        | Cohen’s $d$ ranged between .31 and 1.02 (Table 4 in the article)        |
|                                                                                        | Group 2 | 42             |                                |                                   |                                              |                                                                                                               |                                                                                      |                                                                                                                                                  |                                                                         |
|                                                                                        | Group 3 | 24             |                                |                                   |                                              |                                                                                                               |                                                                                      |                                                                                                                                                  |                                                                         |
|                                                                                        | Group 4 | 14             |                                |                                   |                                              |                                                                                                               |                                                                                      |                                                                                                                                                  |                                                                         |
|                                                                                        | Group 5 | 22             |                                |                                   |                                              |                                                                                                               |                                                                                      |                                                                                                                                                  |                                                                         |
| Niparko, Tobey, Thal, Eisenberg, Wang, Quittner, ... & CDaCI Investigative Team (2010) | Group 1 | 72             | 15.5 mo (3.2)                  | 51.6 mo                           | Testing at 3 y of use                        | Receptive and expressive language: RDLS                                                                       | Non-parametric regression                                                            | Children in group 1 (< 18 mo) had significantly higher rates of growth for both receptive and expressive language than children in other groups. | NC                                                                      |
|                                                                                        | Group 2 | 64             | 29.4 mo (5.6)                  | 65.7 mo                           |                                              |                                                                                                               |                                                                                      |                                                                                                                                                  |                                                                         |
|                                                                                        | Group 3 | 52             | 48.5 mo (7.4)                  | 85 mo                             |                                              |                                                                                                               |                                                                                      |                                                                                                                                                  |                                                                         |
| Percy-Smith, Busch, Sandahl, Nissen, Josvassen, ... & Cayé-Thomassen (2013)            | Group 1 | 28             | Total sample = 19.6 mo         | Total sample = 46.3 mo            | Total sample = 25.9 mo                       | Receptive vocabulary: PPVT-4<br>Receptive language: RDLS<br>“Active vocabulary” (Viborgma-teriale)            | Fisher’s exact tests<br>Logistic regression<br>Odds ratios (Wald tests)              | Children in group 1 (age at CI: 5–11 mo) had higher odds ratios than children in other groups.                                                   | NC                                                                      |
|                                                                                        | Group 2 | 19             |                                |                                   |                                              |                                                                                                               |                                                                                      |                                                                                                                                                  |                                                                         |
|                                                                                        | Group 3 | 36             |                                |                                   |                                              |                                                                                                               |                                                                                      |                                                                                                                                                  |                                                                         |
| Svirsky, Teoh, & Neuburger (2004)                                                      | Group 1 | 12             | 19.7 mo (1.9)                  | From 16 to 84 months              | —                                            | Expressive language: MBCDI or RDLS                                                                            | $t$ tests<br>DTA                                                                     | Children in group 1 had better expressive language skills (for various durations of use).                                                        | NC                                                                      |
|                                                                                        | Group 2 | 34             | 29.8 mo (3.4)                  |                                   | —                                            |                                                                                                               |                                                                                      |                                                                                                                                                  |                                                                         |
|                                                                                        | Group 3 | 29             | 40.6 mo                        |                                   | —                                            |                                                                                                               |                                                                                      |                                                                                                                                                  |                                                                         |

|                                                                          |                               |    |                                   |                            |                                            |                                                                                                                            |                |                                                                                                                                                                                                           |                                                                                                                              |
|--------------------------------------------------------------------------|-------------------------------|----|-----------------------------------|----------------------------|--------------------------------------------|----------------------------------------------------------------------------------------------------------------------------|----------------|-----------------------------------------------------------------------------------------------------------------------------------------------------------------------------------------------------------|------------------------------------------------------------------------------------------------------------------------------|
|                                                                          |                               |    | (2.5)                             |                            |                                            |                                                                                                                            |                |                                                                                                                                                                                                           |                                                                                                                              |
| <b>Dichotomized age at implantation</b>                                  |                               |    |                                   |                            |                                            |                                                                                                                            |                |                                                                                                                                                                                                           |                                                                                                                              |
| Dunn, Walker, Oleson, Kenworthy, Van Voorst, Tomblin, ... & Gantz (2014) | Group 1 (CI under age 2)      | 13 | 1.38 y (0.27)                     | 7.8 y (2.7) [3.0–12.8]     | Periodical testing at 7 to 11 years of age | Receptive language: CELF-3 (subtest Concepts and Directions)<br>Expressive language: CELF-3 (subtest Formulated Sentences) | <i>t</i> tests | At 7 years of age, the younger implanted group had higher both receptive and expressive language scores. By 8 to 10 years of age, no difference was found.                                                | Receptive language: at age 7: .72<br>at age 9: .59<br>Expressive language: at age 7: .92<br>at age 10: .63<br>at age 11: .44 |
|                                                                          | Group 2 (CI from 2 to 4 y)    | 25 | 2.99 y (0.55)                     | 12.2 y (5.04) [3.2–22.4 y] |                                            |                                                                                                                            |                |                                                                                                                                                                                                           |                                                                                                                              |
| Houston & Miyamoto (2010)                                                | Group 1 (CI from 7 to 12 mo)  | 7  | Total sample = 14.8 mo [7.6-22.6] | —                          | Testing at 2-2.5 and 3-4 years of CI use   | Receptive vocabulary: PPVT                                                                                                 | <i>t</i> tests | At both intervals, earlier-implanted group had better scores than the later-implanted group (n=14 at interval 1; n=11 at interval 2).                                                                     | At 2-2.5 y of use: 1.25<br><br>At 3-4 y of use: 1.44                                                                         |
|                                                                          | Group 2 (CI from 16 to 23 mo) | 8  |                                   |                            |                                            |                                                                                                                            |                |                                                                                                                                                                                                           |                                                                                                                              |
| Leigh, Dettman, Dowell, & Briggs (2013)                                  | Group 1                       | 35 | 0.84 mo (0.15)                    | —                          | Testing at 1,2,3, and 5 years of use       | Receptive language: RITLS<br>Receptive vocabulary: PPVT (at 3 years of use)                                                | Correlations   | Receptive language: average growth rate was not different between both groups;<br><br>Receptive vocabulary at age 3: standard scores were correlated with both age at hearing aids fitting and age at CI. | RITLS mean growth: .32<br><br>PPVT at 3 years of use: 1.09                                                                   |
|                                                                          | Group 2                       | 85 | 1.60 mo (0.25)                    | —                          |                                            |                                                                                                                            |                |                                                                                                                                                                                                           |                                                                                                                              |
| Markman, Quittner, Eisenberg, Tobey, Thal, Niparko, & Wang (2011)        | Group 1                       | 34 | 1.15 y (0.17)                     | —                          | Testing at 4-5 years of use                | Receptive and expressive language: CASL (core composite)                                                                   | Regression     | Children in group 1 had better scores in each of the four language tasks. Maternal sensitivity was a significant predictor of language outcomes in both groups.                                           | NC<br><br>NC                                                                                                                 |
|                                                                          | Group 2                       | 62 | 2.88 y (1.03)                     | —                          |                                            |                                                                                                                            |                |                                                                                                                                                                                                           |                                                                                                                              |
| Nicholas & Geers (2013)                                                  | Group 1                       | 27 | 9.6 mo (1.3)                      | 54.4 mo (1.5)              | 44.9 mo                                    | Receptive vocabulary: PPVT<br>Receptive language: PLS<br>Expressive language: PLS                                          | <i>t</i> tests | Mean scores of the earlier implanted group were statistically higher                                                                                                                                      | Receptive vocabulary: .71<br>Receptive                                                                                       |
|                                                                          |                               | 42 | 14.7 mo (2.5)                     | 54.8 mo (1.3)              | 40.1 mo                                    |                                                                                                                            |                |                                                                                                                                                                                                           |                                                                                                                              |

|                                                                |         |    |                                       |                                |                                     |                                                                                                    |                                                  |                                                                                                                                            |                                                                                      |
|----------------------------------------------------------------|---------|----|---------------------------------------|--------------------------------|-------------------------------------|----------------------------------------------------------------------------------------------------|--------------------------------------------------|--------------------------------------------------------------------------------------------------------------------------------------------|--------------------------------------------------------------------------------------|
|                                                                | Group 2 |    |                                       |                                |                                     |                                                                                                    |                                                  | than those of the later implanted group.                                                                                                   | language: .79<br>Expressive language: .60                                            |
| Rinaldi, Baruffaldi, Burdo, & Caselli (2013)                   | Group 1 | 11 | total sample = 14.26 mo (4.69)        | total sample = 28.78 mo (5.08) | total sample = 14.52 mo (5.08)      | Expressive language:<br>MBCDI<br>- words produced<br>- sentences produced<br>- % complex sentences | <i>t</i> -tests on <i>z</i> -scores              | No effect of age at CI (below 12 vs 13-26) on vocabulary size and grammatical skills                                                       | words: .50<br>sentences: .23<br>%complex: .52<br>(same as in Table 3 in the article) |
|                                                                | Group 2 | 11 |                                       |                                |                                     |                                                                                                    |                                                  |                                                                                                                                            |                                                                                      |
| Tobey, Thal, Niparko, Eisenberg, Quittner, Wang, et al. (2013) | Group 1 | 98 | total sample = 29 mo [6 mo–4 y 11 mo] | From 4.8 to 11.5 y             | Testing at 4, 5, and 6 years of use | Receptive and expressive language: CASL (core composite)                                           | Multivariate analyses<br><br>Fisher's exact test | Trajectories of the core composite standard scores at 4, 5, and 6 years of CI use did not significantly differ as a function of age at CI. | NC                                                                                   |
|                                                                | Group 2 | 62 |                                       |                                |                                     |                                                                                                    |                                                  |                                                                                                                                            | NC                                                                                   |
| Uziel, Sillon, Vieu, Artieres, Piron, Daures, & Mondain (2007) | Group 1 | 43 | total sample = 4.8 y (2.3 y)          | From 12 to 24 y                | total sample = 11.7 y (1.7 y)       | Receptive vocabulary: PPVT                                                                         | Odds ratio<br>Chi-square<br>ANOVA                | An older age at implantation increased the risk of a PPVT score below the 50th percentile by a 2.6 factor.                                 | NC                                                                                   |
|                                                                | Group 2 | 39 |                                       |                                |                                     |                                                                                                    |                                                  |                                                                                                                                            | NC                                                                                   |
| Wie (2010)                                                     | Group 1 | 13 | total sample = 11.3 mo (3.9)          | 7 to 29 mo                     | total sample = 37 mo (10.4)         | Receptive language: MSEL; MCDI<br>Expressive language: MSEL; MCDI                                  | <i>t</i> tests                                   | Children in group 1 had higher language scores than children in group 2 at all times of testing.                                           | NC                                                                                   |
|                                                                | Group 2 | 7  |                                       |                                |                                     |                                                                                                    |                                                  |                                                                                                                                            |                                                                                      |

<sup>1</sup>Note: DTA = Developmental Trajectory Analysis; HLM = Hierarchical Linear Modeling.

<sup>2</sup>Note: CASL = Comprehensive Assessment of Spoken Language; CELF = Clinical Evaluation of Language Fundamentals; MCDI = Minnesota Child Development Inventory; MSEL = Mullen Scale of Early Learning; MBCDI = MacArthur-Bates Communicative Development Inventories; PPVT = Peabody Picture Vocabulary Test; PLS = Preschool Language Scale; RDLS = Reynell Developmental Language Scales; RITLS = Rossetti Infant-Toddler Language Scales; SETK = Sprachentwicklungstest für Kinder; TROG = Test for Reception of Grammar; MLU-w = Mean length of utterances-words; NDBM = Number of different bound morphemes; NDRW = Number of different root words.
