# Supplementary material
Source: publisher figshare collection journal article supplement (https://asha.figshare.com/articles/dataset/_/9789041)
Supplement: Supplementary file 2 [file 1]

**Supplemental Material S2.** Effects of age at implantation and language achievement with age as a continuous variable: Information provided by authors for cochlear implant (CI) users and calculated effect sizes (NC = not calculable from information provided).

| Authors                                                              | <i>N</i>                                                                                | Mean age* at CI ( <i>SD</i> ) [range] | Mean age at test ( <i>SD</i> ) [range] | Mean duration of use ( <i>SD</i> ) [range]                            | Language domain: Assessment/task <sup>1</sup>                                                                        | Statistical analyses | Primary findings                                                                                                                                                                       | Effect size (Glass' <i>d</i> ) |
|----------------------------------------------------------------------|-----------------------------------------------------------------------------------------|---------------------------------------|----------------------------------------|-----------------------------------------------------------------------|----------------------------------------------------------------------------------------------------------------------|----------------------|----------------------------------------------------------------------------------------------------------------------------------------------------------------------------------------|--------------------------------|
| Black, Hickson, Black, & Khan (2014)                                 | 174                                                                                     | 44.02 mo (30) [4–180]                 | —                                      | Retrospective data from outcome measures at 18 to 24 months of CI use | Various tests depending on chronological age (e.g., PPVT, PLS, CELF) (depending on the measure, <i>n</i> = 38 to 89) | Regression           | Age at implantation was not significantly associated with language scores. Strongest predictors were family concern and the presence of an inner ear malformation.                     | NC                             |
| Boons, Brokx, Dhooge, Frijns, Peeraer, Vermeulen, et al. (2012)      | 288 (not all participants were tested at all times on all tests: <i>n</i> = 115 to 140) | 26 mo (13) [6–60]                     | Up to 8 years old                      | Testing at 1, 2, and 3 years of CI use                                | Receptive language: RDLS<br>Expressive Language: SELT (Language quotients)                                           | Regression           | Age at implantation was a significant predictor of language skills during the first 3 years after implantation.                                                                        | NC                             |
| Boons, De Raeve, Langereis, Peeraer, Wouters, & Van Wieringen (2013) | 70                                                                                      | Median: 20 mo [6–60]                  | Median: 8 y 2 mo [5–13 y]              | Median: 6 y 4 mo [1;6–10;6 y]                                         | Expressive vocabulary: EOWPVT<br>Expressive syntax: CELF                                                             | Logistic regression  | Age at implantation was not a significant predictor for any of the language components. Strongest predictors were the presence of additional disabilities and multilingualism.         | NC                             |
| Cuda, Murri, Guerzoni, Fabrizi, & Mariani, (2014)                    | 30                                                                                      | 11.8 mo (3.2)                         | 24.2 mo (3.2)                          | Testing at 36 months of age                                           | Expressive vocabulary and grammar: MBCDI                                                                             | Regression           | Age at implantation and sex (girl) were both associated with a higher number of words; sentence complexity was associated with age at implantation, sex, and maternal education level. | NC                             |
| Fagan (2015)                                                         | 9                                                                                       | 12.46 mo                              | At 12                                  | Testing at 4 and 12                                                   | Expressive                                                                                                           | Correlations         | Age at implantation was                                                                                                                                                                | 1.53 (at 12                    |

| Authors                                              | N                             | Mean age* at CI (SD) [range] | Mean age at test (SD) [range]      | Mean duration of use (SD) [range] | Language domain: Assessment/task <sup>1</sup>                                                                         | Statistical analyses       | Primary findings                                                                                                                                                    | Effect size (Glass' d)                                                       |
|------------------------------------------------------|-------------------------------|------------------------------|------------------------------------|-----------------------------------|-----------------------------------------------------------------------------------------------------------------------|----------------------------|---------------------------------------------------------------------------------------------------------------------------------------------------------------------|------------------------------------------------------------------------------|
|                                                      |                               | [8.9–14.4]                   | months of CI use: 25.7 mo (2.05)   | months of CI use                  | vocabulary: MBDCI                                                                                                     |                            | associated with MBDCI score at 12 months of use.                                                                                                                    | months of use)                                                               |
| Geers, Moog, Biedenstein, Brenner, Hayes (2009)      | 153                           | 2; 4 y (0;11) [0;11–5;1]     | 5;10 y (0;6) [4;11–6;11]           | 3;6 y (0;11) [1;0–5;4]            | Receptive vocabulary: PPVT<br>Expressive vocabulary: EVT or EOWPVT                                                    | Regression                 | IQ was the strongest predictor of vocabulary and language scores, followed by parent education level.                                                               | Receptive vocabulary: .47<br>Expressive vocabulary: .50                      |
| Geers, Nicholas, & Moog (2007)                       | sample 1: 74<br>sample 2: 126 | 28.21 mo (11.60)             | 70.04 mo (7.06) [60–83]            | —                                 | Receptive vocabulary: PPVT                                                                                            | Regression                 | Five variables (age at implantation, gender, parent education, age at hearing aid fitting, and age at test) accounted for 24% of the variance in PPVT scores.       | sample 1: .96<br>sample 2: .54                                               |
| Geers, Nicholas, & Sedey (2003)<br>Geers (2004)      | 181                           | 3;5 y (0;10) [1;8–5;4]       | 8;11 y (0;6) [7;11–9;11]           | 5; 6 y (0;9) [3;9–7;6]            | Receptive language: TACL<br>Expressive language: lexical and grammatical measures converted in a Total Language Score | Regression                 | Age at implantation was not significantly associated with language achievement.                                                                                     | NC                                                                           |
| Geers & Nicholas (2013)                              | 60                            | 22.7 mo (7.7) [12–38]        | Testing at 10.5 years old          | 8.6 y (1) [7–11]                  | Receptive vocabulary: PPVT<br>Expressive vocabulary: EOWPVT<br>Receptive language: CELF<br>Expressive language: CELF  | Regression                 | Age at implantation and a set of additional variables (related to auditory, personal, and family factors) were associated with language outcomes at 10.5 years old. | PPVT: .67<br>EOWPVT: .95<br>CELF (receptive): .80<br>CELF (expressive): -.85 |
| Hay-McCutcheon, Iler Kirk, Henning, Gao, & Qi (2008) | 30                            | 4.48 y (1.61) [1.4–7.7]      | Regular testing up to 18 years old | —                                 | Receptive and expressive language: RDLS and CELF                                                                      | Regression (mixed-effects) | Age at CI was significantly associated with early receptive and expressive language measures (from 2 to 7                                                           | NC                                                                           |

| Authors                                 | <i>N</i>  | Mean age* at CI ( <i>SD</i> ) [range] | Mean age at test ( <i>SD</i> ) [range]          | Mean duration of use ( <i>SD</i> ) [range]                                          | Language domain: Assessment/task <sup>1</sup>                                                             | Statistical analyses                                 | Primary findings                                                                                                                            | Effect size (Glass' <i>d</i> )                                                                               |
|-----------------------------------------|-----------|---------------------------------------|-------------------------------------------------|-------------------------------------------------------------------------------------|-----------------------------------------------------------------------------------------------------------|------------------------------------------------------|---------------------------------------------------------------------------------------------------------------------------------------------|--------------------------------------------------------------------------------------------------------------|
|                                         |           |                                       |                                                 |                                                                                     |                                                                                                           |                                                      | years of age), but not the later language measures (from 9 years old onwards).                                                              |                                                                                                              |
| Hayes, Geers, Treiman, & Moog, (2009)   | 65        | 2.69 y (0.90) [1.08–4.75]             | 5 y (at first test) longitudinal yearly testing | 2.39 y (1.29) (at first test) [0–6.42]                                              | Receptive vocabulary: PPVT                                                                                | Multilevel regression models (growth curve analyses) | Children who received a CI at a younger age showed a faster receptive vocabulary growth rate than children who received an implant later.   | NC                                                                                                           |
| Lund (2015) Meta-analysis of 16 studies | 34 to 158 | 16 to 46.5 mo                         | 49 to 109 mo                                    | —                                                                                   | Receptive and expressive vocabulary                                                                       | Meta-regression                                      | Neither age at implantation, nor duration of use, nor age at the time of testing were associated to the magnitude of weighted effect sizes. | —                                                                                                            |
| Nicholas & Geers (2007; 2008; 2009)     | 76        | 23.16 mo (7.75) [12–38]               | Testing at 3.5 and 4.5 years old                | At 3.5 y: 19.76 mo (7.64) [7–32]<br>At 4.5 y: 55.09 mo (1.15) [52–57]               | Receptive and expressive vocabulary and language (various tests: PPVT, EOWPVT, PLS, CELF)                 | Regression (linear and quadratic)                    | Age at CI and a set of additional variables (related to auditory, personal, and family factors), were associated with language outcomes.    | NC                                                                                                           |
| Schorr, Roth, & Fox (2008)              | 39        | [1;3–8;2 y]                           | 9 y [5;4–14;11]                                 | [1;8–11;8 y]                                                                        | Various tests according to chronological age (e.g., PPVT, TOLD)                                           | Regression                                           | Age at implantation was associated only with receptive vocabulary scores.                                                                   | NC                                                                                                           |
| Szagun & Stumper (2012)                 | 25        | 20.4 mo (11) [6–42]                   | —                                               | Testing at 12, 18, 24, and 30 months of CI use<br>- Analyses at 30 months of CI use | Expressive vocabulary: word types<br>Expressive grammar: MLUm<br>Expressive vocabulary and grammar: MBCDI | Correlations ANCOVA                                  | At 30 months of use, only maternal education was significantly associated with language measures.                                           | Language sample:<br>-word types: .32<br>-MLUm: .34<br><br>MBCDI:<br>-words: .56<br>-sentence complexity: .58 |

| Authors                                                 | <i>N</i> | Mean age* at CI ( <i>SD</i> ) [range] | Mean age at test ( <i>SD</i> ) [range] | Mean duration of use ( <i>SD</i> ) [range]                 | Language domain: Assessment/task <sup>1</sup>                                                                 | Statistical analyses      | Primary findings                                                                                                                                                                                                                                                   | Effect size (Glass' <i>d</i> )                                                                       |
|---------------------------------------------------------|----------|---------------------------------------|----------------------------------------|------------------------------------------------------------|---------------------------------------------------------------------------------------------------------------|---------------------------|--------------------------------------------------------------------------------------------------------------------------------------------------------------------------------------------------------------------------------------------------------------------|------------------------------------------------------------------------------------------------------|
|                                                         |          |                                       |                                        |                                                            |                                                                                                               |                           |                                                                                                                                                                                                                                                                    | -inflectional morphology: .84                                                                        |
| Szagun & Schramm (2015)                                 | 48       | 24 mo (10) [6–46]                     | —                                      | Testing at regular intervals from 6 to 36 months of CI use | Language sample:<br>-MLUm<br>-Type and token frequencies of determiners<br>-Type frequencies of lexical words | Regression Correlations   | Language measures from 6.5 up to 20 months of CI use were not associated with age at implantation. At 24 and 30 months of use, age at CI added 9% and 10% of unique variance of MLU (parental expansions accounted for 48% and 43% of the unique variance of MLU). | MLU at 24 months of use: .46<br>MLU at 30 months of use: .50                                         |
| Tomblin, Barker, Spencer, Zhang, & Gantz (2005)         | 29       | 21 mo (7) [10–40]                     | 5 to 78 mo                             | —                                                          | Expressive language: MCDI PLS (converted into an Expressive Language Quotient (ELQ))                          | Hierarchical linear model | Both at 12 and 24 months of CI use, age at implantation was significantly associated with ELQs.                                                                                                                                                                    | PLS ELQ at 24 months of use: -1.8<br>MCDI ELQ at 12 months of use: .85<br>at 24 months of use: -1.35 |
| Willstedt-Svensson, Löfqvist, Almqvist, & Sahlén (2004) | 15       |                                       |                                        |                                                            | Receptive grammar: TROG<br>Expressive grammar: Lund Test of Grammar                                           | Regression                | Age at CI was associated with both receptive and expressive grammar scores; with working memory added as a predictor, age at CI did not account for a significant proportion of variance.                                                                          | Receptive grammar: 1.75<br>Expressive grammar: 1.5                                                   |

\*mo: months; y: years

<sup>1</sup>Note: MCDI = Minnesota Child Development Inventory; TOLD = Test of Language Development; MLUm = Mean length of utterances (morphemes); SELT = Schlichting Expressive Language Test; CELF = Clinical Evaluation of Language Fundamentals; MBCDI = MacArthur-Bates Communicative Development Inventories; PPVT = Peabody Picture Vocabulary Test; PLS = Preschool Language Scale; RDLS = Reynell

Developmental Language Scales; TACL = Test of Auditory Comprehension of Language; TROG = Test for Reception of Grammar; EVT = Expressive Vocabulary Test; EOWPVT = Expressive One-Word Picture Vocabulary Test.
