# Supplementary material
Source: publisher figshare collection journal article supplement (https://asha.figshare.com/articles/dataset/_/9789041)
Supplement: Supplementary file 3 [file 1]

**Supplemental Material S3.** Additional studies that reported associations between age at cochlear implantation (CI) and language (effect of age at CI was not the main goal of the study).

| Authors                                                                       | <i>N</i> | Mean age at<br>implantation<br>[range]<br>( <i>SD</i> ) | Mean age at<br>testing<br>[range]<br>( <i>SD</i> )                       | Mean<br>duration of<br>CI use<br>[range]<br>( <i>SD</i> ) | Language domain:<br>Assessment/task <sup>1</sup>                                                 | Statistical<br>analyses | Primary findings                                                                                                                                                                   |
|-------------------------------------------------------------------------------|----------|---------------------------------------------------------|--------------------------------------------------------------------------|-----------------------------------------------------------|--------------------------------------------------------------------------------------------------|-------------------------|------------------------------------------------------------------------------------------------------------------------------------------------------------------------------------|
| Castellanos,<br>Kronenberger,<br>Beer, Henning,<br>Colson, &<br>Pisoni (2014) | 35       | 25.47 mo<br>[8.28–47.70]<br>(10.77)                     | 13.48 y<br>[7.80–23.36]<br>(10.77)                                       | 11.36 y<br>[7.08–19.84]<br>(3.40)                         | Receptive<br>vocabulary: PPVT;<br>Receptive and<br>expressive language:<br>CELF                  | Regression              | Receptive vocabulary and<br>speech intelligibility<br>during preschool predicted<br>later outcomes.<br>Age at implantation did<br>not add to the variance in<br>language outcomes. |
| Duchesne,<br>Sutton, &<br>Bergeron (2009)                                     | 27       | 21.66 mo<br>[8–28]<br>(5.47)                            | 68.4 mo<br>[42–99]<br>(17.76)                                            | 46.85 mo<br>[23–71]<br>(15.61)                            | Receptive and<br>expressive language:<br>RDLS                                                    | Correlations            | Correlation between<br>RDLS scores and age at<br>implantation were not<br>statistically significant.                                                                               |
| Geers et al.<br>(2017)                                                        | 97       | 21.8 mo                                                 | early<br>(5.0–7.9 y)<br>and late<br>(9.0–11.9 y)<br>elementary<br>grades | —                                                         | Receptive and<br>expressive language:<br>CASL                                                    | Regression              | Age at implantation<br>significantly predicted<br>CASL scores, both in early<br>and later elementary<br>grades.                                                                    |
| Guasti,<br>Papagno,<br>Vernice,<br>Giuliani, &<br>Burdo (2012)                | 33       | 21.7 mo<br>[12–56]<br>(10.4)                            | 63.9 mo<br>[50–82]<br>(8.66)                                             | 42.7 mo<br>[23–60]<br>(9.5)                               | Receptive<br>vocabulary: PPVT<br>Receptive grammar:<br>TCGB<br>Elicitation of clitic<br>pronouns | Mixed model<br>analysis | A significant effect of age<br>at implantation was found<br>for the production of clitic<br>pronouns.                                                                              |

| <b>Authors</b>                                                     | <b><i>N</i></b> | <b>Mean age at<br/>implantation<br/>[range]<br/>(<i>SD</i>)</b> | <b>Mean age at<br/>testing<br/>[range]<br/>(<i>SD</i>)</b> | <b>Mean<br/>duration of<br/>CI use<br/>[range]<br/>(<i>SD</i>)</b>       | <b>Language domain:<br/>Assessment/task<sup>1</sup></b>                                                                                                      | <b>Statistical<br/>analyses</b>               | <b>Primary findings</b>                                                                                                         |
|--------------------------------------------------------------------|-----------------|-----------------------------------------------------------------|------------------------------------------------------------|--------------------------------------------------------------------------|--------------------------------------------------------------------------------------------------------------------------------------------------------------|-----------------------------------------------|---------------------------------------------------------------------------------------------------------------------------------|
| Hammer,<br>Coene, Rooryck,<br>Gillis, &<br>Govaerts (2010)         | 48              | 16 mo<br>[5–43]                                                 | Between 4<br>and 7 years<br>of age                         | —                                                                        | Finite verb<br>production<br>( <i>z</i> -scores):<br>spontaneous<br>language sample                                                                          | Regression                                    | A significant association<br>between finite verb<br>production and age at<br>implantation was found at<br>4 and 5 years of age. |
| Nitttrouer,<br>Lowenstein, &<br>Holloman<br>(2016)                 | 51              | 22 mo<br>(17)                                                   | 103 mo<br>(5)                                              | Testing at 36,<br>48, and 72<br>months of<br>age, and in<br>second grade | Expressive grammar:<br>- MLU<br>- number of<br>conjunctions<br>- number of personal<br>pronouns                                                              | Pearson<br>product-<br>moment<br>correlations | No significant correlations<br>we found between age at<br>(first) CI and any of the<br>grammatical measures.                    |
| Nitttrouer,<br>Sansom, Low,<br>Rice, &<br>Caldwell-Tarr<br>(2014)  | 21              | 21 mo<br>(13)                                                   | 82 mo<br>(5)                                               | 61 mo<br>(13)                                                            | Expressive language<br>(language sample):<br>- MLU<br>number of:<br>- conjunctions<br>- personal pronouns<br>- final bound<br>morphemes<br>- different words | Correlations                                  | Age at (first) implant was<br>significantly correlated<br>with:<br>- MLU<br>- number of different<br>words.                     |
| Ruffin,<br>Kronenberger,<br>Colson,<br>Henning, &<br>Pisoni (2013) | 51              | 35.4 mo<br>(19.9)                                               | 15.2 y<br>(4.5)                                            | 12.2 y<br>(3.6)                                                          | Receptive<br>vocabulary: PPVT<br>Receptive and<br>expressive language:<br>CELF                                                                               | Correlations                                  | Age at implantation was<br>not associated with both<br>PPVT and CELF scores.                                                    |

<sup>1</sup>Note: CASL = Comprehensive Assessment of Spoken Language; CELF = Clinical Evaluation of Language Fundamentals; MLU = mean length of utterances; PPVT = Peabody Picture Vocabulary Test; RDLS = Reynell Developmental Language Scales; TCGB = Test di Comprensione Grammaticale per Bambini.
